# Supplementary material for: Angiotensin-Converting Enzyme 2 SNPs as Common Genetic Loci and Optimal Early Identification Genetic Markers for COVID-19
Source: MDPI journal article supplement (doi:10.3390/pathogens11080947), 2022-08-22
Supplement: s1 [file s1]

---

## **Supplemental information**

### **Angiotensin-converting enzyme 2 SNPs as the common genetic loci and optimal early identification genetic markers for COVID-19**

Yan Ma<sup>1, #</sup>, Qiuyue Li<sup>1, #</sup>, Jun Chen<sup>1, #</sup>, Songmei Liu<sup>2, #</sup>, Shanshan Liu<sup>1</sup>, Xiaomeng He<sup>1</sup>, Yun Ling<sup>1</sup>, Jianghua Zheng<sup>3</sup>, Christopher Corpe<sup>4</sup>, Hongzhou Lu<sup>5, \*</sup>, Jin Wang<sup>1, \*</sup>

<sup>1</sup>Shanghai Public Health Clinical Center, Fudan University, Shanghai, China; <sup>2</sup>Center for Gene Diagnosis, Zhongnan Hospital of Wuhan University, Donghu Road 169#, Wuhan 430071, P.R. China; <sup>3</sup>Department of Laboratory Medicine, Zhoupu Hospital Affiliated to Shanghai University of Medicine & Health Sciences, Shanghai, China; <sup>4</sup>King's College London, London, Nutritional Science Department, 150 Stamford Street, Waterloo, London, SE19NH, United Kingdom; <sup>5</sup>National Clinical Research Centre for Infectious Diseases, The Third People's Hospital of Shenzhen and The Second Affiliated Hospital of Southern University of Science and Technology, Shenzhen 518112, Guangdong Province, China.

**Running Title:** ACE2 SNPs as the optimal early identification genetic markers for COVID-19

**\*Correspondence should be addressed to:**

Jin Wang, M.D.& Ph.D.  
Scientific Research Center,  
Shanghai Public Health Clinical Center  
Fudan University  
2901 Caolang Road, Jinshan District  
Shanghai 201508, China  
Ph: 86-21-57036495  
Fax: 86-21-57247094  
Email: [wjincityu@yahoo.com](mailto:wjincityu@yahoo.com)

Hongzhou Lu, M.D.& Ph.D.  
National Clinical Research Centre for Infectious Diseases,  
The Third People's Hospital of Shenzhen and The Second Affiliated Hospital of Southern University of Science and Technology,  
Shenzhen 518112, Guangdong Province, China.  
Tel: +86-18930810088  
E-Mail: [luhongzhou@fudan.edu.cn](mailto:luhongzhou@fudan.edu.cn)

## 1. Supplemental Figures

### 1.1. Supplementary Fig. S1. The blast analysis of ACE2 SNPs

#### rs6632677: 10321C>G

Homo sapiens. Seq  
Myotis brandtii (Brandt's bat).seq  
Consensus

TGCATTCAAGGTGCTGGCTAGAGCTATGGTCTCT 4232  
CTGACTGGATGCCAGGTAACCAAGCAGCTACACCT 5456  
a t a g g a g c c t

#### rs2048683: 16694A>T

Homo sapiens. Seq  
Myotis brandtii (Brandt's bat).seq  
Consensus

CCTAAATTAGATGAAATTACCACTTCAATAAGATA 10598  
AGGAGTCAACAACTTTTATATAAAGGTAAAGATA 11024  
a a a t t a t a a g a t a

#### rs4646142: 22129C>T

Homo sapiens. Seq  
Myotis brandtii (Brandt's bat).seq  
Consensus

CCATGGACCCATAAAAGCAACTACACAATCGAGA 16024  
TTAGGAGAAAATAAAATCTTCCAAAAACCTTGGA 18131  
a g a a t a a a c c a a g a

#### rs4240157: 38229G>C

Homo sapiens. Seq  
Myotis brandtii (Brandt's bat).seq  
Consensus

GTAAATAGTGTTTCAGGGGGTTTGATTCTGTAATGT 32256  
GACTATTGCCITTCAGAGGGTTTGAACATTCTAAGG 32997  
g a t g t t c a g g g g t t t g a t a g

#### rs2074192: 42403G>A

Homo sapiens. Seq  
Myotis brandtii (Brandt's bat).seq  
Consensus

CACAAATGAATAAATGCCAACCATTATACATTT 36062  
AACTCTGGTCGAACTCTTGTTGAGGGGACAATT 37469  
a c g a a t c a c a t t

## 2. Supplemental Tables

### 2.1. Supplementary Table S1. Frequency of signs and symptoms according to COVID-19 phenotypes.

| Signs and symptoms              | Mild<br>(n =42) | Common<br>(n =184) | Severe<br>(n =7) | Critical<br>(n =13) | Total<br>(n =246) |
|---------------------------------|-----------------|--------------------|------------------|---------------------|-------------------|
| Fever                           | 27 (64.3%)      | 155 (84.2%)        | 7 (100%)         | 8 (61.5%)           | 197 (80.1%)       |
| Dry cough                       | 20 (47.6%)      | 83 (45.1%)         | 3 (42.9%)        | 8 (61.5%)           | 114 (46.3%)       |
| Expectoration                   | 6 (14.3%)       | 30 (16.3%)         | 2 (28.6%)        | 6 (46.2%)           | 44 (17.9%)        |
| Dyspnea                         | 0 (0)           | 7 (3.8%)           | 1 (14.3%)        | 3 (23.1%)           | 11 (4.5%)         |
| Headache                        | 2 (4.8%)        | 11 (6%)            | 0 (0)            | 0 (0)               | 13 (5.3%)         |
| Dizziness                       | 1 (2.4%)        | 5 (2.7%)           | 0 (0)            | 1 (7.7%)            | 7 (2.8 %)         |
| Fatigue                         | 4 (9.5%)        | 7 (3.8%)           | 0 (0)            | 4 (30.8%)           | 15 (6.1%)         |
| Sore/Itchy/dry throat           | 3 (7.1%)        | 12 (6.5%)          | 0 (0)            | 4 (30.8%)           | 19 (7.7%)         |
| Nasal congestion                | 2 (4.8%)        | 7 (3.8%)           | 0 (0)            | 1 (7.7%)            | 10 (4.1%)         |
| Runny nose                      | 1 (2.4%)        | 7 (3.8%)           | 0 (0)            | 1 (7.7%)            | 9 (3.7%)          |
| Diarrhea                        | 1 (2.4%)        | 3 (1.6%)           | 0 (0)            | 0 (0)               | 4 (1.6%)          |
| Myalgia                         | 0 (0)           | 5 (2.7%)           | 0 (0)            | 1 (7.7%)            | 6 (2.4%)          |
| Chilly                          | 0 (0)           | 8 (4.3%)           | 0 (0)            | 1 (7.7%)            | 9 (3.7%)          |
| Others symptoms                 | 2 (4.8%)        | 23 (12.5%)         | 0 (0)            | 2 (15.4%)           | 27 (11.0%)        |
| <b>Initial therapy</b>          |                 |                    |                  |                     |                   |
| Oxygen therapy                  | 2 (4.8%)        | 56 (30.4%)         | 7 (100%)         | 9 (69.2%)           | 74 (30.1%)        |
| Prezcobix                       | 0 (0)           | 14 (7.6%)          | 0 (0)            | 1 (7.7%)            | 15 (6.1%)         |
| Arbidol                         | 12 (28.6%)      | 40 (21.7%)         | 2 (28.6%)        | 2 (15.4%)           | 56 (22.8%)        |
| Interferon                      | 12 (28.6%)      | 71 (38.6%)         | 2 (28.6%)        | 6 (46.2%)           | 91 (37.0%)        |
| Lopinavir and Ritonavir Tablets | 0 (0)           | 37 (20.1%)         | 2 (28.6%)        | 1 (7.7%)            | 40 (16.3%)        |
| Meropenem                       | 0 (0)           | 1 (0.5%)           | 0 (0)            | 1 (7.7%)            | 2 (0.8%)          |
| Moxifloxacin                    | 3 (7.1%)        | 15 (8.1%)          | 0 (0)            | 2 (15.4%)           | 20 (8.1%)         |
| Omeprazole                      | 1 (2.4%)        | 3 (1.6%)           | 0 (0)            | 2 (15.4%)           | 6 (2.4%)          |
| Vitamin C                       | 0 (0)           | 15 (8.2%)          | 1 (14.3%)        | 1 (7.7%)            | 17 (6.9%)         |
| Hydroxychloroquine              | 7 (16.7%)       | 7 (3.8%)           | 1 (14.3%)        | 0 (0)               | 15 (6.1%)         |
| ShuFengJieDuJiaoNang            | 3 (7.1%)        | 10 (5.4%)          | 1 (14.3%)        | 0 (0)               | 14 (5.7%)         |
| Others agents                   | 14 (33.3%)      | 27 (14.7%)         | 1 (14.3%)        | 9 (69.2%)           | 51 (20.7%)        |

Signs and symptoms were collected from the electronic medical records for the hospitalized patients.

**2.2. Supplementary Table S2. Five ACE2 SNPs in this study are associated with coexisting diseases in the previous studies.**

| <b>Group</b>                 | <b>rs2048683</b> | <b>rs2074192</b> | <b>rs4240157</b> | <b>rs6632677</b> | <b>rs4646142</b> |
|------------------------------|------------------|------------------|------------------|------------------|------------------|
| Cardiovascular               | +                | +                | +                | -                | -                |
| hypertension                 | +                | +                | +                | +                | +                |
| Dyslipidemia                 | +                | +                | +                | +                | +                |
| Left ventricular hypertrophy | -                | +                | +                | +                | -                |
| diabetes                     | +                | +                | +                | -                | -                |
| Stroke                       | -                | +                | -                | -                | +                |
| Retinopathy                  | -                | +                | -                | -                | -                |
| Number of articles published | 3                | 10               | 6                | 4                | 1                |

+ represents literature reported, - represents no literature reported
